# Supplementary material
Source: Springer Nature journal article supplement (https://www.springermedizin.de/resource/supplementary/12969_2010_793_MOESM2_ESM.pdf/9593032)
Supplement: MOESM2 [file 9593032]

THE UNIVERSITY OF CHICAGO  
LIBRARY

1111 N. EASTERN AVENUE  
CHICAGO, ILL. 60607
